# Supplementary material for: Neural Correlates of the Propensity for Retaliatory Behavior in Youths With Disruptive Behavior Disorders
Source: Atypon-hosted journal article supplement (doi:10.1176/appi.ajp.2015.15020250), 2015-10-06
Supplement: appi.ajp.2015.15020250.ds001.pdf [file appi.ajp.2015.15020250.ds001.pdf]

## **1.0 Supplemental Methods**

### **1.1 Exclusion Criteria**

Exclusion criteria were pervasive developmental disorder, Tourette's syndrome, lifetime history of psychosis, depression, bipolar disorder, generalized, social or separation anxiety disorder, PTSD, neurologic disorder, history of head trauma, history of substance dependence, and IQ<75. All youth and parents completed Kiddie Schedule for Affective Disorders and Schizophrenia (KSADS; Kaufman et al., 1997) assessments conducted by a doctoral-level clinician as part of a comprehensive psychiatric and psychological assessment. The K-SADS has demonstrated good validity and inter-rater reliability (kappa >0.75 for all diagnoses; Kaufman et al., 1997) The K-SADS assesses for substance dependence but, due to exclusion criteria, no children in either group met criteria for these diagnoses. IQ was assessed with the Wechsler Abbreviated Scale of Intelligence (two-subtest form). Youth meeting K-SADS criteria for Conduct Disorder or Oppositional Defiant Disorder were included in the DBD group, while HCY did not meet criteria for any K-SAD diagnosis. Parents completed the Inventory of Callous-Unemotional Traits (ICU; Frick, 2004), a measure of callous-unemotional traits and the Proactive/Reactive Aggression Rating Scale (Dodge & Coie, 1987).

### **1.2 Task Description**

The Social Fairness Game. Participants were presented with a variant of the Ultimatum game (Sanfey, Rilling, Aronson, Nystrom, & Cohen, 2003); the Social Fairness Game. Participants were informed they would be playing the game with a series of partners. During the game participants encountered 12 partners, who were indicated by name. Trials were presented randomly. At the outset of each trial, the partners had \$20 and the participant had \$3. During the offer-phase (3000ms), the partner

offered to divide their \$20 with the participant either fairly (e.g. \$10 to participant; \$10 to partner) or unfairly (e.g. \$6, \$4, \$2 to participant; \$14, \$16, \$18 to partner). A 500-3500ms randomly jittered interval followed the offer-phase. During the decision-phase (4000ms), the participants used a button press to indicate whether they wished to i) accept the partners offer and give up their \$3 in exchange (e.g. receive \$10 from the fair offer) or ii) to spend some of their \$3 in order to punish to the partner. Participants had the option to spend \$1, \$2 or \$3 and cost the partner \$7, \$14 or \$21 respectively. Next, during the outcome-phase (3000ms), the results of the participants' choices were displayed (e.g. partner gets -\$1, you get \$0), followed finally by a second 500-3500 randomly jittered interval preceded the next trial. Each participant was exposed 120 trails (60 fair trails, 24 \$14/\$6 trials, 24 \$16/\$4 trails and 12 \$18/\$2 trails) over four 6 minute 52 second runs.

### **1.3 MRI parameters and Imaging data preprocessing**

Participants were scanned using a 3T GE Signa scanner. A total of 170 functional images per run were taken with a gradient echo planar imaging (EPI) sequence (repetition time=2560 milliseconds; echo time=27 milliseconds; 64x64 matrix; 90° flip angle; 24cm field of view). Whole-brain coverage was obtained with 46 axial slices (thickness, 2.5mm; .5mm spacing; in-plane resolution, 3.75x3.75mm). A high-resolution anatomical scan (3-dimensional spoiled gradient recalled acquisition in a steady state; repetition time=7 milliseconds; echo time=2.984 milliseconds; 24cm field of view; 12° flip angle; 128 axial slices; thickness, 1.2 mm; 256x256 matrix) in register with the EPI data set was obtained with whole-brain coverage.

Data were analyzed within the general linear model framework using Analysis of Functional Neuroimages (AFNI; Cox, 1996). Individual and group-level analyses were conducted. The first five volumes in each scan series, collected prior to equilibrium magnetization, were discarded. Motion correction was performed by registering all volumes in the EPI dataset to a volume collected close to acquisition of the high-resolution anatomical dataset.

The EPI datasets for each subject were spatially smoothed (isotropic 6 mm kernel) to reduce variability among individuals and generate group maps. Next, the time series data were normalized by dividing the signal intensity of a voxel at each time point by the mean signal intensity of that voxel for each run and multiplying the result by 100, producing regression coefficients representing percent-signal change.

#### **1.4 Analysis of Variance on the Modulated Regression Coefficients.**

The group analysis of the BOLD data was performed on the modulated regression coefficients from individual subject analyses using a 3 (diagnosis: youth with DBD+CU, youth with DBD-CU, HCY) by 2 (task phase: offer-phase, decision-phase) repeated-measures ANOVA conducted on the BOLD data modulated by offer unfairness in the offer-phase and punishment level in the decision-phase. The AFNI ClustSim program was used to establish a family-wise error corrected threshold (22 voxel clusters at  $p=.005$ , corrected to  $p=.05$ ) for a whole-brain analysis. Due to their small size and/or theoretical importance, small volume corrections (SVC) for multiple comparisons were calculated for amygdala, PAG and vmPFC. The amygdala SVC, calculated using an anatomically defined mask (Eickhoff-Zilles Architectonic Atlas: 50% probability), yielded a threshold of 6 voxels at an initial threshold of  $p=.02$ . As anatomically defined masks were not available in AFNI, the PAG and vmPFC SVCs were calculated using 10mm spheres centered on the peak coordinates from previous work (PAG  $x,y,z= 3,-23,-4$ ; vmPFC  $x,y,z= -4,36,-5$ ; Mobbs et al., 2007) and yielded a threshold of 9.2 voxels at an initial threshold of  $p=.02$  for both regions. Post-hoc analyses were performed to facilitate interpretations. For these analyses, average percent signal change was measured across all voxels within each region of interest (ROI) generated from the functional masks, and data were analyzed using appropriate follow-up tests.

#### **1.5 Generalized Psychophysiological Interaction Analysis Description**

A series of generalized psychophysiological interaction (gPPI) analyses was conducted to examine differential functional connectivity between right and left amygdala seeds and other brain regions following the method described by McLaren, Ries, Xu, and Johnson (2012). The average activations from seed regions were extracted from the time series. Interaction terms were created for each seed region by multiplying each average time series with four task time course vectors (fair and unfair offers, accepted and punished decisions) that were coded 1 or 0 for condition present or absent. The four interaction terms, the four task regressors (fair and unfair offers, accepted and punished decisions) and the average activation of the seed region were entered into a linear regression model along with 6 motion regressors for each seed region. Differences in functional connectivity between conditions was examined using two 3 (diagnosis: youth with disruptive behavior disorder with high levels of CU traits [DBD+CU], youth with disruptive behavior disorder with low levels of CU traits [DBD-CU], healthy control youth [HCY]) by 2 (provocation

level: low [fair/accept], high [unfair/punished]) by 2 (task phase: offer-phase, decision-phase) repeated-measures Analyses of Variance (ANOVA); one for each seed region.

## **2.0 Supplemental Results**

### **2.1 Behavioral Results**

A repeated-measures ANOVA was also conducted on response latencies. No significant effects or interactions involving diagnosis were observed [ $F < .39$ ,  $p > .76$ ], though a main effect of punishment level was observed [ $F = 19.37$ ,  $p < .01$ ]. Participants were quickest to respond to fair offers, followed by very unfair offers (\$18/\$2) and slowest to respond to moderately unfair offers (\$14/\$6 and \$16/\$4; Table 1).

### **2.2 ANOVA Results- Whole-brain Effects and Interactions**

A significant diagnosis-by-task phase interaction was observed in regions including bilateral dlPFC and left dorsal caudate. In bilateral dlPFC, a significantly greater difference in modulated activation during the decision-phase versus the offer-phase was observed in youth with DBD+CU relative to healthy youth [ $t = 5.198$  &  $5.231$ ,  $p < .001$ ] and in youth with DBD-CU relative to healthy youth [ $t = 3.431$  &  $3.93$ ,  $p < .001$ ]. A trend towards a greater difference in modulated activation during the decision-phase versus the offer-phase was observed in youth with DBD-CU relative to youth with DBD+CU in right dlPFC [ $t = 2.041$ ,  $p = .051$ ], but not in left dlPFC [ $t = 1.215$ ,  $p = .235$ ]. In left dorsal caudate, a significantly greater difference in modulated activation during the decision-phase versus the offer-phase was observed in youth with DBD-CU relative to youth with DBD+CU [ $t = 2.439$ ,  $p < .021$ ] and healthy youth [ $t = 4.020$ ,  $p < .001$ ]. Youth with DBD+CU and healthy youth did not differ [ $t = 1.542$ ,  $p = .136$ ].

### **2.3 Generalized Psychophysiological Interaction Analysis (gPPI)**

#### **2.3.1 Left Amygdala Seed**

Diagnosis-by-Provocation Level Interaction. A significant diagnosis-by-provocation level interaction was observed in dorsomedial frontal cortex (dmFC). During high provocation conditions, connectivity between amygdala and dmFC was greater for healthy youth relative to youth with DBD+CU and DBD-CU [ $t = 2.41$  &  $2.17$  respectively,  $p < .03$ ].

No activations survived correction for multiple comparisons for any other contrast using a left amygdala seed beyond that reported in the manuscript.

### 2.3.2 Right Amygdala Seed

**Main Effect of Task Phase.** Using a right amygdala seed, a main effect of task was observed in right iFG, right middle temporal gyrus and bilateral post-central gyrus where greater functional connectivity in all regions was seen during the decision- relative to the offer-phase.

**Diagnosis-by-Provocation Level Interaction.** In addition to the regions reported in the manuscript, a significant diagnosis-by-provocation level interaction was observed in dmFC, left dlPFC, left STG, right middle temporal gyrus, right middle temporal/occipital gyrus, parahippocampal gyrus, right fusiform gyrus, right right cuneus, a bilateral region of motor cortex, left postcentral gyrus and bilateral precentral gyrus. During high provocation trials, healthy youth showed greater connectivity in all regions relative to youth with DBD-CU [ $t=2.69-3.98$ ,  $p<.01$ ] and youth with DBD+CU [ $t=2.32-3.80$ ,  $p<.03$ ], except in left postcentral gyrus where the difference between healthy youth and youth with DBD+CU was at a trend [ $t=1.93$ ,  $p=.06$ ] and in dmFC where the difference between healthy youth and youth with DBD-CU was a trend [ $t=1.71$ ,  $p=.1$ ].

**Provocation Level-by-Task Phase Interaction.** A significant provocation-level-by-task phase interaction was observed in right fusiform gyrus and left temporal pole. In both regions, greater functional connectivity was observed in low provocation relative to high provocation during the offer-phase and in high provocation relative to low provocation during the decision-phase [ $t>2.43$ ,  $p<.18$ ].

No activations survived comparison for multiple comparisons in any other contrasts.

Supplemental Table 1: Brain regions demonstrating differential modulated BOLD responses in the offer- relative to the decision-phase in 28 healthy youth, 15 youth with DBD+CU and 15 youth with DBD-CU.

| Region <sup>a</sup>                                                | Coordinates of Peak Activation <sup>b</sup> |       |       |       |       | F     | p      | Voxels |
|--------------------------------------------------------------------|---------------------------------------------|-------|-------|-------|-------|-------|--------|--------|
|                                                                    | Left/Right                                  | BA    | x     | y     | z     |       |        |        |
| <u>Diagnosis-by-Task Phase</u>                                     |                                             |       |       |       |       |       |        |        |
| dorsolateral prefrontal gyrus                                      | Right                                       | 9/10  | 31.5  | 46.5  | 23.5  | 13.97 | <.0001 | 82     |
| dorsolateral prefrontal gyrus                                      | Left                                        | 9     | -31.5 | 43.5  | 32.5  | 12.63 | <.0001 | 72     |
| caudate                                                            | Left                                        |       | -22.5 | 10.5  | 20.5  | 10.78 | <.0001 | 58     |
| middle insula/transverse temporal gyrus                            | Right                                       |       | 40.5  | -25.5 | 11.5  | 15.66 | <.0001 | 250    |
| middle insula/transverse temporal gyrus                            | Left                                        |       | -37.5 | -40.5 | 20.5  | 11.81 | .0001  | 247    |
| parahippocampal gyrus/fusiform                                     | Right                                       |       | 46.5  | -28.5 | -18.5 | 10.10 | .0002  | 23     |
| supplementary motor area                                           | Right                                       | 6     | 13.5  | -7.5  | 53.5  | 9.46  | .0003  | 69     |
| middle occipital gyrus                                             | Right                                       | 19    | 43.5  | -70.5 | -3.5  | 8.26  | .0008  | 35     |
| middle temporal                                                    | Right                                       | 20    | 58.5  | -40.5 | -9.5  | 8.66  | .0006  | 23     |
| <u>Main Effect of Diagnosis</u>                                    |                                             |       |       |       |       |       |        |        |
| culmen                                                             | Right                                       | 37    | 19.5  | -40.5 | -18.5 | 11.28 | <.0001 | 56     |
| <u>Main Effect of Task Phase (Decision-phase &gt; Offer-phase)</u> |                                             |       |       |       |       |       |        |        |
| fronto-parietal network                                            | Right                                       |       | 31.5  | -61.5 | 38.5  |       |        | 8918   |
| <i>dorsomedial frontal cortex*</i>                                 |                                             | 6/32  | 1.5   | 16.5  | 44.5  |       |        | 139    |
| <i>inferior frontal cortex*</i>                                    | Left                                        | 6     | -43.5 | 1.5   | 29.5  |       |        | 166    |
| <i>inferior frontal cortex*</i>                                    | Right                                       |       | 40.5  | 25.5  | 23.5  |       |        | 30     |
| <i>parietal*</i>                                                   | Right                                       | 40    | 31.5  | -61.5 | 38.5  |       |        | 141    |
| <i>postcentral/parietal*</i>                                       | Left                                        | 3     | -31.5 | -25.5 | 50.5  |       |        | 559    |
| <i>culmen*</i>                                                     | Left                                        |       | -13.5 | -49.5 | -15.5 |       |        | 25     |
| <i>postcentral*</i>                                                | Right                                       | 3     | 37.5  | -28.5 | 50.5  |       |        | 162    |
| <i>precentral*</i>                                                 | Right                                       | 6     | 28.5  | 1.5   | 50.5  |       |        | 22     |
| inferior temporal gyrus                                            | Left                                        | 20    | -52.5 | -31.5 | -6.5  |       |        | 196    |
| dorsal cingulate cortex                                            | Left                                        | 24    | -4.5  | 4.5   | -26.5 |       |        | 45     |
| <u>Main Effect of Task Phase (Offer-phase &gt; Decision-phase)</u> |                                             |       |       |       |       |       |        |        |
| ventromedial prefrontal cortex                                     | Left                                        | 10/32 | -4.5  | 46.5  | -0.5  |       |        | 159    |
| temporal pole                                                      | Left                                        | 21    | -49.5 | 4.5   | -15.5 |       |        | 30     |
| middle temporal                                                    | Left                                        | 39    | -52.5 | -64.5 | 20.5  |       |        | 56     |
| parahippocampal gyrus                                              | Right                                       | 36    | 31.5  | -37.5 | -3.5  |       |        | 26     |

|                   |       |    |       |       |       |     |
|-------------------|-------|----|-------|-------|-------|-----|
| middle insula     | Right | 13 | 37.5  | -22.5 | 20.5  | 601 |
| middle insula     | Left  |    | -43.5 | -19.5 | 17.5  | 49  |
| middle insula     | Left  |    | -40.5 | -10.5 | 2.5   | 35  |
| postcentral gyrus | Right | 3  | 37.5  | -28.5 | 50.5  | 875 |
| culmen            | Left  |    | -13.5 | -49.5 | -15.5 | 333 |
| cuneus            | Left  | 18 | -13.5 | -91.5 | 20.5  | 33  |
| precuneus         | Left  | 24 | -13.5 | -46.5 | 32.5  | 24  |

<sup>a</sup> According to the Talairach Daemon Atlas (<http://www.nitrc.org/projects/tal-daemon/>). \* local maxima at p=.0000001

<sup>b</sup> Based on the Tournoux & Talairach standard brain template. BA= Brodmann's Area

Supplemental Table 2: Brain Regions Demonstrating Differential Functional Connectivity in 28 healthy youth, 15 youth with DBD+CU and 15 youth with DBD-CU.

| Region <sup>a</sup>                    | Coordinates of Peak Activation <sup>b</sup> |                   |       |       |       |       | F      | p  | Voxels |
|----------------------------------------|---------------------------------------------|-------------------|-------|-------|-------|-------|--------|----|--------|
|                                        | Left/Right                                  | BA                | x     | y     | z     |       |        |    |        |
| <b><u>Right Amygdala</u></b>           |                                             |                   |       |       |       |       |        |    |        |
|                                        |                                             | <u>Task Phase</u> |       |       |       |       |        |    |        |
| inferior frontal gyrus                 | Right                                       | 45                | 46.5  | 22.5  | 17.5  | 26.47 | <.0001 | 99 |        |
| middle temporal                        | Right                                       | 21                | 55.5  | -28.5 | -6.5  | 12.13 | .0010  | 38 |        |
| postcentral gyrus                      | Right                                       | 2                 | 49.5  | -22.5 | 32.5  | 14.65 | .0004  | 31 |        |
| postcentral gyrus                      | Left                                        | 2                 | -55.5 | -25.5 | 44.5  | 19.14 | <.0001 | 26 |        |
| <u>Provocation Level-by-Task Phase</u> |                                             |                   |       |       |       |       |        |    |        |
| middle temporal                        | Left                                        | 3                 | -55.5 | -1.5  | -21.5 | 15.01 | .0003  | 23 |        |
| middle occipital gyrus                 | Left                                        | 30                | -28.5 | -73.5 | 14.5  | 18.37 | <.0001 | 29 |        |
| declive                                | Right                                       |                   | 31.5  | -67.5 | -18.5 | 14.99 | .0003  | 41 |        |

<sup>a</sup> According to the Talairach Daemon Atlas (<http://www.nitrc.org/projects/tal-daemon/>).

<sup>b</sup> Based on the Tournoux & Talairach standard brain template, BA= Brodmann's Area



Supplemental Table 3: Brain Regions Demonstrating Differential Modulated BOLD Responses in 28 healthy youth, youth with DBD without ADHD.

| Region <sup>a</sup>                      | Coordinates of Peak Activation <sup>b</sup> |      |       |       |       | F     | p      |
|------------------------------------------|---------------------------------------------|------|-------|-------|-------|-------|--------|
|                                          | Left/Right                                  | BA   | x     | y     | z     |       |        |
| <u>Regions of Interest</u>               |                                             |      |       |       |       |       |        |
| periaqueductal gray                      | Right                                       |      | 12    | -25   | -2    | 11.99 | .0001  |
| amygdala                                 | Right                                       |      | 19    | -4    | -8    | 14.34 | <.0001 |
| ventromedial prefrontal cortex           | Left                                        |      | -11   | 36    | 1     | 8.509 | .0009  |
| <u>Diagnosis-by-Task Phase</u>           |                                             |      |       |       |       |       |        |
| dorsolateral prefrontal gyrus            | Right                                       | 9/10 | 31.5  | 46.5  | 17.5  | 14.81 | <.0001 |
| dorsolateral prefrontal gyrus            | Left                                        | 9    | -31.5 | 40.5  | 26.5  | 14.43 | <.0001 |
| middle insula/transverse temporal gyrus  | Right                                       |      | 10.5  | -61.5 | 56.5  | 28.97 | <.0001 |
| middle insula/transverse temporal gyrus* | Left                                        |      | -43.5 | -16.5 | 14.5  | 23.43 | <.0001 |
| supplementary motor area*                | Right                                       | 6    | 13.5  | -25.5 | 56.5  | 14.65 | <.0001 |
| caudate*                                 | Left                                        |      | -43.5 | 16.5  | 14.5  | 23.43 | <.0001 |
| parahippocampal gyrus/fusiform*          | Right                                       |      | 52.5  | -31.5 | -18.5 | 14.99 | <.0001 |
| middle temporal*                         | Right                                       | 20   | 40.5  | -58.5 | -3.5  | 23.81 | <.0001 |
| <u>Main Effect of Diagnosis</u>          |                                             |      |       |       |       |       |        |
| culmen                                   | Right                                       | 37   | 31.5  | -49.5 | -9.5  | 12.60 | <.0001 |

<sup>a</sup> According to the Talairach Daemon Atlas (<http://www.nitrc.org/projects/tal-daemon/>). \* local maxima at p=.001

<sup>b</sup> Based on the Tournoux & Talairach standard brain template, BA= Brodmann's Area

Supplemental Table 4: Brain Regions Demonstrating Differential Modulated BOLD Responses in un-medicated youth.

| Region <sup>a</sup>                     | Left/Right | Coordinates of Peak Activation <sup>b</sup> |       |       |       | F     | p      |
|-----------------------------------------|------------|---------------------------------------------|-------|-------|-------|-------|--------|
|                                         |            | BA                                          | x     | y     | z     |       |        |
| <u>Regions of Interest</u>              |            |                                             |       |       |       |       |        |
| periaqueductal gray                     | Right      |                                             | 10    | -19   | 1     | 4.759 | .0133  |
| amygdala                                | Right      |                                             | 22    | -5    | -5    | 4.590 | .0153  |
| ventromedial prefrontal cortex          | Left       |                                             | -11   | 33    | -2    | 5.607 | .0067  |
| <u>Diagnosis-by-Task Phase</u>          |            |                                             |       |       |       |       |        |
| dorsolateral prefrontal gyrus           | Right      | 9/10                                        | 31.5  | 49.5  | 20.5  | 11.73 | <.0001 |
| dorsolateral prefrontal gyrus           | Left       | 9                                           | -31.5 | 43.5  | 32.5  | 14.98 | <.0001 |
| caudate                                 | Left       |                                             | -22.5 | 10.5  | 17.5  | 12.80 | <.0001 |
| middle insula/transverse temporal gyrus | Right      |                                             | 40.5  | -31.5 | 14.5  | 11.42 | <.0001 |
| middle insula/transverse temporal gyrus | Left       |                                             | -37.5 | -40.5 | 20.5  | 7.760 | .0013  |
| parahippocampal gyrus/fusiform          | Right      |                                             | 46.5  | -28.5 | -18.5 | 8.937 | <.0001 |
| supplementary motor area                | Right      | 6                                           | 10.5  | -13.5 | 56.5  | 10.36 | <.0001 |
| middle occipital gyrus                  | Right      | 19                                          | 28.5  | -61.5 | -9.5  | 7.876 | .0012  |
| middle temporal                         | Right      | 20                                          | 55.5  | -46.5 | -12.5 | 10.07 | .0002  |
| <u>Main Effect of Diagnosis</u>         |            |                                             |       |       |       |       |        |
| culmen                                  | Right      | 37                                          | 25.5  | -43.5 | -15.5 | 9.744 | .0003  |

<sup>a</sup> According to the Talairach Daemon Atlas (<http://www.nitrc.org/projects/tal-daemon/>).

<sup>b</sup> Based on the Tournoux & Talairach standard brain template, BA= Brodmann's Area

Supplemental Table 5: Brain Regions Demonstrating Differential Functional Connectivity in youth without ADHD.

| Region <sup>a</sup>                   | Left/Right | Coordinates of Peak Activation <sup>b</sup> |       |       |       | F     | p     |
|---------------------------------------|------------|---------------------------------------------|-------|-------|-------|-------|-------|
|                                       |            | BA                                          | x     | y     | z     |       |       |
| <b>Left Amygdala</b>                  |            |                                             |       |       |       |       |       |
| <u>Diagnosis-by-Provocation Level</u> |            |                                             |       |       |       |       |       |
| dorsomedial prefrontal gyrus          | Left       | 6                                           | 7.5   | 10.5  | 62.5  | 5.87  | .0075 |
| <b>Right Amygdala</b>                 |            |                                             |       |       |       |       |       |
| <u>Diagnosis-by-Provocation Level</u> |            |                                             |       |       |       |       |       |
| paracentral/cingulate cortex          | Right      | 24                                          | 5.5   | -10.5 | 56.5  | 6.73  | .0033 |
| superior temporal gyrus               | Right      | 21                                          | 58.5  | -34.5 | -0.5  | 8.85  | .0008 |
| postcentral gyrus                     | Left       | 3                                           | -25.5 | -31.5 | 50.5  | 5.59  | .0077 |
| declive                               | Right      |                                             | 46.5  | -67.5 | -3.5  | 8.19  | .0012 |
| claustrum                             | Left       | 13                                          | -34.5 | -19.5 | -3.5  | 7.49  | .0019 |
| precentral                            | Left       | 6                                           | -40.5 | -4.5  | 53.5  | 4.46  | .0186 |
| declive                               | Left       |                                             | -55.5 | -52.5 | -15.5 | 7.51  | .0019 |
| dorsomedial prefrontal cortex         | Left       | 8                                           | 1.5   | 28.5  | 44.5  | 9.50  | .0005 |
| middle temporal cortex                | Right      | 37                                          | 49.5  | -67.5 | 11.5  | 8.52  | .0009 |
| parahippocampal gyrus                 | Right      |                                             | 37.5  | -22.5 | -12.5 | 10.34 | .0003 |
| cuneus                                | Right      | 19                                          | 28.5  | -82.5 | 29.5  | 6.68  | .0034 |
| fusiform gyrus                        | Right      | 37                                          | 28.5  | -46.5 | -12.5 | 7.97  | .0014 |
| precentral gyrus                      | Right      | 4                                           | 34.5  | -25.5 | 38.5  | 3.60  | .0376 |
| ventromedial prefrontal cortex        | Right      | 10                                          | 1.5   | 43.5  | -0.5  | 6.38  | .0042 |

<sup>a</sup> According to the Talairach Daemon Atlas (<http://www.nitrc.org/projects/tal-daemon/>).

<sup>b</sup> Based on the Tournoux & Talairach standard brain template, BA= Brodmann's Area

Supplemental Table 6: Brain Regions Demonstrating Differential Functional Connectivity in un-medicated youth.

| Region <sup>a</sup>                   | Left/Right | Coordinates of Peak Activation <sup>b</sup> |       |       | F     | p     |        |
|---------------------------------------|------------|---------------------------------------------|-------|-------|-------|-------|--------|
|                                       |            | BA                                          | x     | y     |       |       | z      |
| <b><u>Left Amygdala</u></b>           |            |                                             |       |       |       |       |        |
| <u>Diagnosis-by-Provocation Level</u> |            |                                             |       |       |       |       |        |
| dorsomedial prefrontal gyrus          | Left       | 6                                           | -4.5  | 4.5   | 56.5  | 9.54  | <.0001 |
| postcentral gyrus                     | Left       | 40                                          | -31.5 | -34.5 | 53.5  | 7.71  | .0013  |
| <b><u>Right Amygdala</u></b>          |            |                                             |       |       |       |       |        |
| <u>Diagnosis-by-Provocation Level</u> |            |                                             |       |       |       |       |        |
| paracentral/cingulate cortex          | Right      | 24/32                                       | 25.5  | -40.5 | 50.5  | 9.05  | .0005  |
| superior temporal gyrus               | Right      | 21                                          | 58.5  | -40.5 | -0.5  | 14.29 | <.0001 |
| postcentral gyrus                     | Left       | 3                                           | -25.5 | -31.5 | 53.5  | 10.30 | .0002  |
| declive                               | Right      |                                             | 37.5  | -73.5 | -15.5 | 9.94  | .0003  |
| claustrum                             | Left       | 13                                          | -37.5 | -22.5 | -0.5  | 13.03 | <.0001 |
| precentral                            | Left       | 6                                           | -40.5 | -4.5  | 53.5  | 7.38  | .0004  |
| declive                               | Left       |                                             | -49.5 | -58.5 | -21.5 | 11.03 | .0001  |
| dorsomedial prefrontal cortex         | Left       | 8                                           | 1.5   | 28.5  | 44.5  | 11.43 | <.0001 |
| middle temporal cortex                | Right      | 37                                          | 49.5  | -67.5 | 11.5  | 8.53  | .0007  |
| parahippocampal gyrus                 | Right      |                                             | 37.5  | -22.5 | -12.5 | 11.06 | .0001  |
| cuneus                                | Right      | 19                                          | 28.5  | -79.5 | 29.5  | 8.25  | .0006  |
| fusiform gyrus                        | Right      | 37                                          | 28.5  | -46.5 | -12.5 | 10.11 | .0008  |
| precentral gyrus                      | Right      | 4                                           | 34.5  | -25.5 | 38.5  | 5.72  | .0061  |
| ventromedial prefrontal cortex        | Right      | 32/10                                       | 1.5   | 46.5  | 5.5   | 8.07  | .0010  |

<sup>a</sup> According to the Talairach Daemon Atlas (<http://www.nitrc.org/projects/tal-daemon/>).

<sup>b</sup> Based on the Tournoux & Talairach standard brain template, BA= Brodmann's Area

## Supplementary references.

- Cox, R. W. (1996). AFNI: software for analysis and visualization of functional magnetic resonance neuroimages. *Comput Biomed Res*, 29(3), 162-173. doi: S0010480996900142 [pii]
- Dodge, K. A., & Coie, J. D. (1987). Social-information-processing factors in reactive and proactive aggression in children's peer groups. *Journal of Personality and Social Psychology*, 53(6), 1146-1158. doi: 10.1037/0022-3514.53.6.1146
- Frick. (2004). The Inventory of Callous-Unemotional Traits. Unpublished Ratings Scale. Department of Psychology. University of New Orleans. New Orleans.
- IBM. (2012). IBM SPSS Statistics For MacOSX (Version 21.0). Armonk, NY: IBM Corp.
- Kaufman, J., Birmaher, B., Brent, D., Rao, U., Flynn, C., Moreci, P., . . . Ryan, N. (1997). Schedule for Affective Disorders and Schizophrenia for School-Age Children-Present and Lifetime version (K-SADS-PL): Initial reliability and validity data. *Journal of the American Academy of Child & Adolescent Psychiatry*, 36(7), 980-988. doi: 10.1097/00004583-199707000-00021
- McLaren, D. G., Ries, M. L., Xu, G., & Johnson, S. C. (2012). A generalized form of context-dependent psychophysiological interactions (gPPI): a comparison to standard approaches. *Neuroimage*, 61(4), 1277-1286. doi: 10.1016/j.neuroimage.2012.03.068
- Mobbs, D., Petrovic, P., Marchant, J. L., Hassabis, D., Weiskopf, N., Seymour, B., . . . Frith, C. D. (2007). When fear is near: threat imminence elicits prefrontal-periaqueductal gray shifts in humans. *Science*, 317(5841), 1079-1083. doi: 317/5841/1079 [pii]  
10.1126/science.1144298 [doi]
- Sanfey, A. G., Rilling, J. K., Aronson, J. A., Nystrom, L. E., & Cohen, J. D. (2003). The neural basis of economic decision-making in the Ultimatum Game. *Science*, 300(5626), 1755-1758. doi: 10.1126/science.1082976 [doi]  
300/5626/1755 [pii]
